# Supplementary material for: Molecular Markers for Detecting Schistosoma Species by Loop-Mediated Isothermal Amplification
Source: PubMed Central journal article supplement (PMC7396120; doi:10.1155/2020/8042705), 2020-07-22
Supplement: 8042705.f1.pdf [file 8042705.f1.pdf]

# 1 Supplementary material

2

3

**Table 1. Gene sequences located and analysed for *S. bovis***

| <i>S. bovis</i> sequences                                        | Degree of identity according to databases |                                                                                                                                |                                                                                                                                                                                                  |
|------------------------------------------------------------------|-------------------------------------------|--------------------------------------------------------------------------------------------------------------------------------|--------------------------------------------------------------------------------------------------------------------------------------------------------------------------------------------------|
|                                                                  | BLAST at NCBI                             | SchistoDB                                                                                                                      | Sanger                                                                                                                                                                                           |
| rRNA5-8S<br>genome (155 bp)<br>FJ588862                          | Genus <i>Schistosoma</i>                  | 100% <i>S. mansoni</i><br>99% <i>S. haematobium</i><br>100% coverage                                                           | 96% <i>S. curassoni</i><br>100% coverage                                                                                                                                                         |
| 18S rRNA<br>genome (1,864 bp)<br>AY157238                        | Genus <i>Schistosoma</i>                  | 99% <i>S. mansoni</i><br>93% <i>S. haematobium</i><br>100% coverage                                                            | 99% <i>S. curassoni</i><br>100% coverage                                                                                                                                                         |
| rRNA-28S<br>genome (3,829 bp)<br>AY157266                        | Genus <i>Schistosoma</i>                  | 98% <i>S. mansoni</i><br>86% <i>S. haematobium</i><br>100% coverage                                                            | 99% <i>S. curassoni</i><br>100% coverage                                                                                                                                                         |
| ITS 1<br>genome, between<br>18S and 5.8S (457<br>bp) FJ588862    | Genus <i>Schistosoma</i>                  | 95% <i>S. mansoni</i><br>87% <i>S. haematobium</i><br>100% coverage                                                            | 98% <i>S. curassoni</i><br>100% coverage                                                                                                                                                         |
| ITS 2<br>genome, between<br>5.8S and 28S (313<br>bp)<br>AF146030 | Genus <i>Schistosoma</i>                  | 93% <i>S. mansoni</i><br>and <i>S. haematobium</i><br>100% coverage                                                            | 97% <i>S. curassoni</i><br>100% coverage                                                                                                                                                         |
| Tetraspanin 23<br>genome<br>(1,620 bp)<br>JX844194               | Genus <i>Schistosoma</i>                  | 94% <i>S. haematobium</i><br>85% <i>S. mansoni</i><br>100% coverage                                                            | 89% <i>S. curassoni</i><br>91% <i>S. mattheei</i><br>85% <i>S. intercalatum</i><br>100% coverage                                                                                                 |
| Tetraspanin 23<br>genome<br>(1,617 bp)<br>JX844196               | Genus <i>Schistosoma</i>                  | 93% <i>S. haematobium</i><br>86% <i>S. mansoni</i><br>100% coverage                                                            | 89-99% <i>S. curassoni</i><br>92-95% <i>S. mattheei</i><br>83-95% <i>S. intercalatum</i><br>100% coverage                                                                                        |
| Tetraspanin 23<br>genome<br>(291 bp<br>- 1,620 bp)<br>JX844194   | No homology with other<br>schistosomes    | 89% <i>S. haematobium</i><br>87% <i>S. mansoni</i><br>87% <i>S. japonicum</i><br>Overlapping in small parts<br>of the sequence | 60-61% <i>S. intercalatum</i><br>60-65% <i>S. margrebowiei</i><br>61-65% <i>S. curassoni</i><br>60% <i>S. guineensis</i><br>65% <i>S. mattheei</i><br>57-60% <i>S. rodhaini</i><br>100% coverage |
| 14-3-3 protein<br>genome<br>(832 bp)<br>DQ176433                 | Genus <i>Schistosoma</i>                  | 99% <i>S. haematobium</i><br>92% <i>S. mansoni</i><br>100% coverage                                                            | 98% <i>S. curassoni</i><br>100% coverage                                                                                                                                                         |
| Glutathione S-<br>transferase genome<br>(781 bp)<br>M87800       | Genus <i>Schistosoma</i>                  | 99% <i>S. haematobium</i><br>90% <i>S. mansoni</i><br>100% coverage                                                            | 98% <i>S. curassoni</i><br>100% coverage                                                                                                                                                         |

|                                                 |                                                                          |                                                                                    |                                                                                                                |
|-------------------------------------------------|--------------------------------------------------------------------------|------------------------------------------------------------------------------------|----------------------------------------------------------------------------------------------------------------|
| Repeat sequence 1 genome (203 bp) DQ831697      | <i>S. curassoni</i> ,<br><i>S. mattheei</i> and<br><i>S. haematobium</i> | 85%–95% <i>S. haematobium</i><br>76%–83% <i>S. mansoni</i><br><br>No 100% coverage | 82-100% <i>S. curassoni</i><br>80% <i>S. mattheei</i><br><br>100% coverage                                     |
| Repeat sequence 2 genome (227 bp) DQ831700      | <i>Schistosoma haematobium</i> group                                     | 94% <i>S. haematobium</i><br><br>100% coverage                                     | 85-95% <i>S. curassoni</i><br>87-94% <i>S. mattheei</i><br>92-93% <i>S. margrebowiei</i><br><br>100% coverage  |
| Repeat sequence 3 genome (161 bp) DQ831699      | Genus <i>Schistosoma</i>                                                 | 94% <i>S. haematobium</i><br>89% <i>S. mansoni</i><br><br>100% coverage            | 89% <i>S. curassoni</i><br>92% <i>S. margrebowiei</i><br><br>100% coverage                                     |
| Repeat sequence 4 genome (216 bp) Mitochondrial | <i>Schistosoma haematobium</i> group                                     | 95% <i>S. haematobium</i><br><br>Almost 100% coverage                              | 94-96% <i>S. curassoni</i><br>95-100% <i>S. mattheei</i><br>85-97% <i>S. margrebowiei</i><br><br>100% coverage |
| COX-1 DQ831698 (503 bp) AY318827                | Genus <i>Schistosoma</i>                                                 | 90% <i>S. haematobium</i><br>80% <i>S. mansoni</i><br><br>100% coverage            | 65-77% <i>S. curassoni</i><br>83% <i>S. guineensis</i><br>55-75% <i>S. mattheei</i><br><br>100% coverage       |
| Mitochondrial COX-1 (1,224 bp) AJ519521         | Genus <i>Schistosoma</i>                                                 | 89% <i>S. haematobium</i><br>80% <i>S. mansoni</i><br><br>100% coverage            | 72-94% <i>S. curassoni</i><br>84% <i>S. guineensis</i><br>73% <i>S. mattheei</i><br><br>100% coverage          |
| Mitochondrial 12S rRNA (801 bp) FJ897168        | Genus <i>Schistosoma</i>                                                 | 84-95% <i>S. haematobium</i><br>84% <i>S. mansoni</i><br><br>100% coverage         | 98% <i>S. curassoni</i><br>91-94% <i>S. guineensis</i><br><br>100% coverage                                    |
| Mitochondrial 16S rRNA (390 bp) EU513556        | Genus <i>Schistosoma</i>                                                 | 93% <i>S. haematobium</i><br>84% <i>S. mansoni</i><br><br>100% coverage            | 96% <i>S. curassoni</i><br><br><br>100% coverage                                                               |

#### NADH

|                                                        |                                                                                                                                                            |                                                                                                                                                               |                                                                                                                                                                         |
|--------------------------------------------------------|------------------------------------------------------------------------------------------------------------------------------------------------------------|---------------------------------------------------------------------------------------------------------------------------------------------------------------|-------------------------------------------------------------------------------------------------------------------------------------------------------------------------|
| Mitochondrial NADH subunit 6 (592 bp) FJ897164         | <i>S. curassoni</i> and<br><i>S. haematobium</i> (100% and<br>94% coverage and 80%<br>identity)<br><i>S. guineensis</i> (92% identity<br>and 70% coverage) | 84% <i>S. haematobium</i><br>69-86% <i>S. mansoni</i><br>100% coverage<br>81%-93% <i>S. japonicum</i><br>(overlapping only occurred<br>in very small regions) | 85% <i>S. curassoni</i><br>62-67% <i>S. margrebowiei</i><br>70% <i>S. intercalatum</i><br>65-75% <i>S. guineensis</i><br>62-65% <i>S. mattheei</i><br><br>100% coverage |
| Mitochondrial NADH consensus x3 (2,215 bp) Sub 4, 3, 1 | <i>Schistosoma haematobium</i> group                                                                                                                       | 81% <i>S. haematobium</i><br>70% <i>S. mansoni</i><br>Almost 100% coverage<br>68% <i>S. japonicum</i><br>No 100% coverage                                     | 92% <i>S. curassoni</i><br>56-68% <i>S. margrebowiei</i><br>56-75% <i>S. guineensis</i><br>56-68% <i>S. mattheei</i><br><br>100% coverage                               |

|                                                |                                                                              |                                                                                                                                                              |                                                                                                                                                                                             |
|------------------------------------------------|------------------------------------------------------------------------------|--------------------------------------------------------------------------------------------------------------------------------------------------------------|---------------------------------------------------------------------------------------------------------------------------------------------------------------------------------------------|
| Mitochondrial NADH subunit 4 (700 bp) HM594942 | <i>S. curassoni</i> (100%),<br><i>S. margrebowiei</i> (75%) and 95% coverage | 82% <i>S. haematobium</i><br>68-83% <i>S. mansoni</i><br>100% coverage<br>76%-86% <i>S. japonicum</i> ,<br>(overlapping only occurred in very small regions) | 88-92% <i>S. curassoni</i><br>75% <i>S. margrebowiei</i><br>78% <i>S. intercalatum</i><br>75% <i>S. guineensis</i><br>59-68% <i>S. mattheei</i><br>100% coverage<br>95% <i>S. curassoni</i> |
| Mitochondrial NADH subunit 3 (369 bp) HM594942 | <i>S. curassoni</i> (94% identity and 100% coverage)                         | 76% <i>S. mansoni</i><br>75% <i>S. japonicum</i><br>136-362 bp overlapping<br>88%-95% <i>S. haematobium</i><br>and almost 100% coverage                      | 70-85% <i>S. margrebowiei</i><br>75% <i>S. intercalatum</i><br>73% <i>S. guineensis</i><br>79% <i>S. mattheei</i><br>100% coverage                                                          |
| Mitochondrial NADH subunit 1 (678 bp) HM594942 | <i>S. curassoni</i> (94% identity and 99% overlapping)                       | 70% <i>S. mansoni</i><br>66% <i>S. japonicum</i><br>83% <i>S. haematobium</i><br>Almost 100% coverage in all                                                 | 92% <i>S. curassoni</i><br>58-68% <i>S. margrebowiei</i><br>78% <i>S. intercalatum</i><br>72% <i>S. guineensis</i><br>78% <i>S. mattheei</i><br>70% <i>S. rodhaini</i><br>100% coverage     |

\*Specific sequences selected for each case are highlighted in colour.

**Table 2. Degree of ITS-1 and ITS-2 sequence identity regarding schistosome species in the different databases**

| <i>Schistosoma</i> spp. sequence                             | Degree of identity according to BLAST databases at NCBI | SchistoDB                                                                                          | Sanger                                                                                                                                                                                                                           |
|--------------------------------------------------------------|---------------------------------------------------------|----------------------------------------------------------------------------------------------------|----------------------------------------------------------------------------------------------------------------------------------------------------------------------------------------------------------------------------------|
| ITS-2 nuclear genome, between 5.8S and 28S (311 bp) GU257398 | All species from the genus <i>Schistosoma</i>           | 92% <i>S. mansoni</i><br>91% <i>S. haematobium</i><br>81% <i>S. japonicum</i><br><br>100% coverage | 89-97% <i>S. bovis</i><br>90-92% <i>S. intercalatum</i><br>91% <i>S. curassoni</i><br>89-93% <i>S. guineensis</i><br>90-95% <i>S. margrebowiei</i><br>78-96% <i>S. mattheei</i><br>81-93% <i>S. rodhaini</i><br>100% coverage    |
| ITS-1 nuclear genome, between 18S and 5.8S (457 bp) GU257398 | All species from the genus <i>Schistosoma</i>           | 95% <i>S. mansoni</i><br>88% <i>S. haematobium</i><br>86% <i>S. japonicum</i><br><br>100% coverage | 84-98% <i>S. bovis</i><br>81-99% <i>S. intercalatum</i><br>77-98% <i>S. curassoni</i><br>81-96% <i>S. guineensis</i><br>96-98% <i>S. margrebowiei</i><br>78-97% <i>S. mattheei</i><br>85-96% <i>S. rodhaini</i><br>100% coverage |

\* Specific sequences selected for each case are highlighted in colour
